# Supplementary material for: Neoplastic transformation of porcine mammary epithelial cells in vitro and tumor formation in vivo
Source: Springer Nature journal article supplement (doi:10.1186/s12885-015-1572-7), 2015-07-30

Figure S9

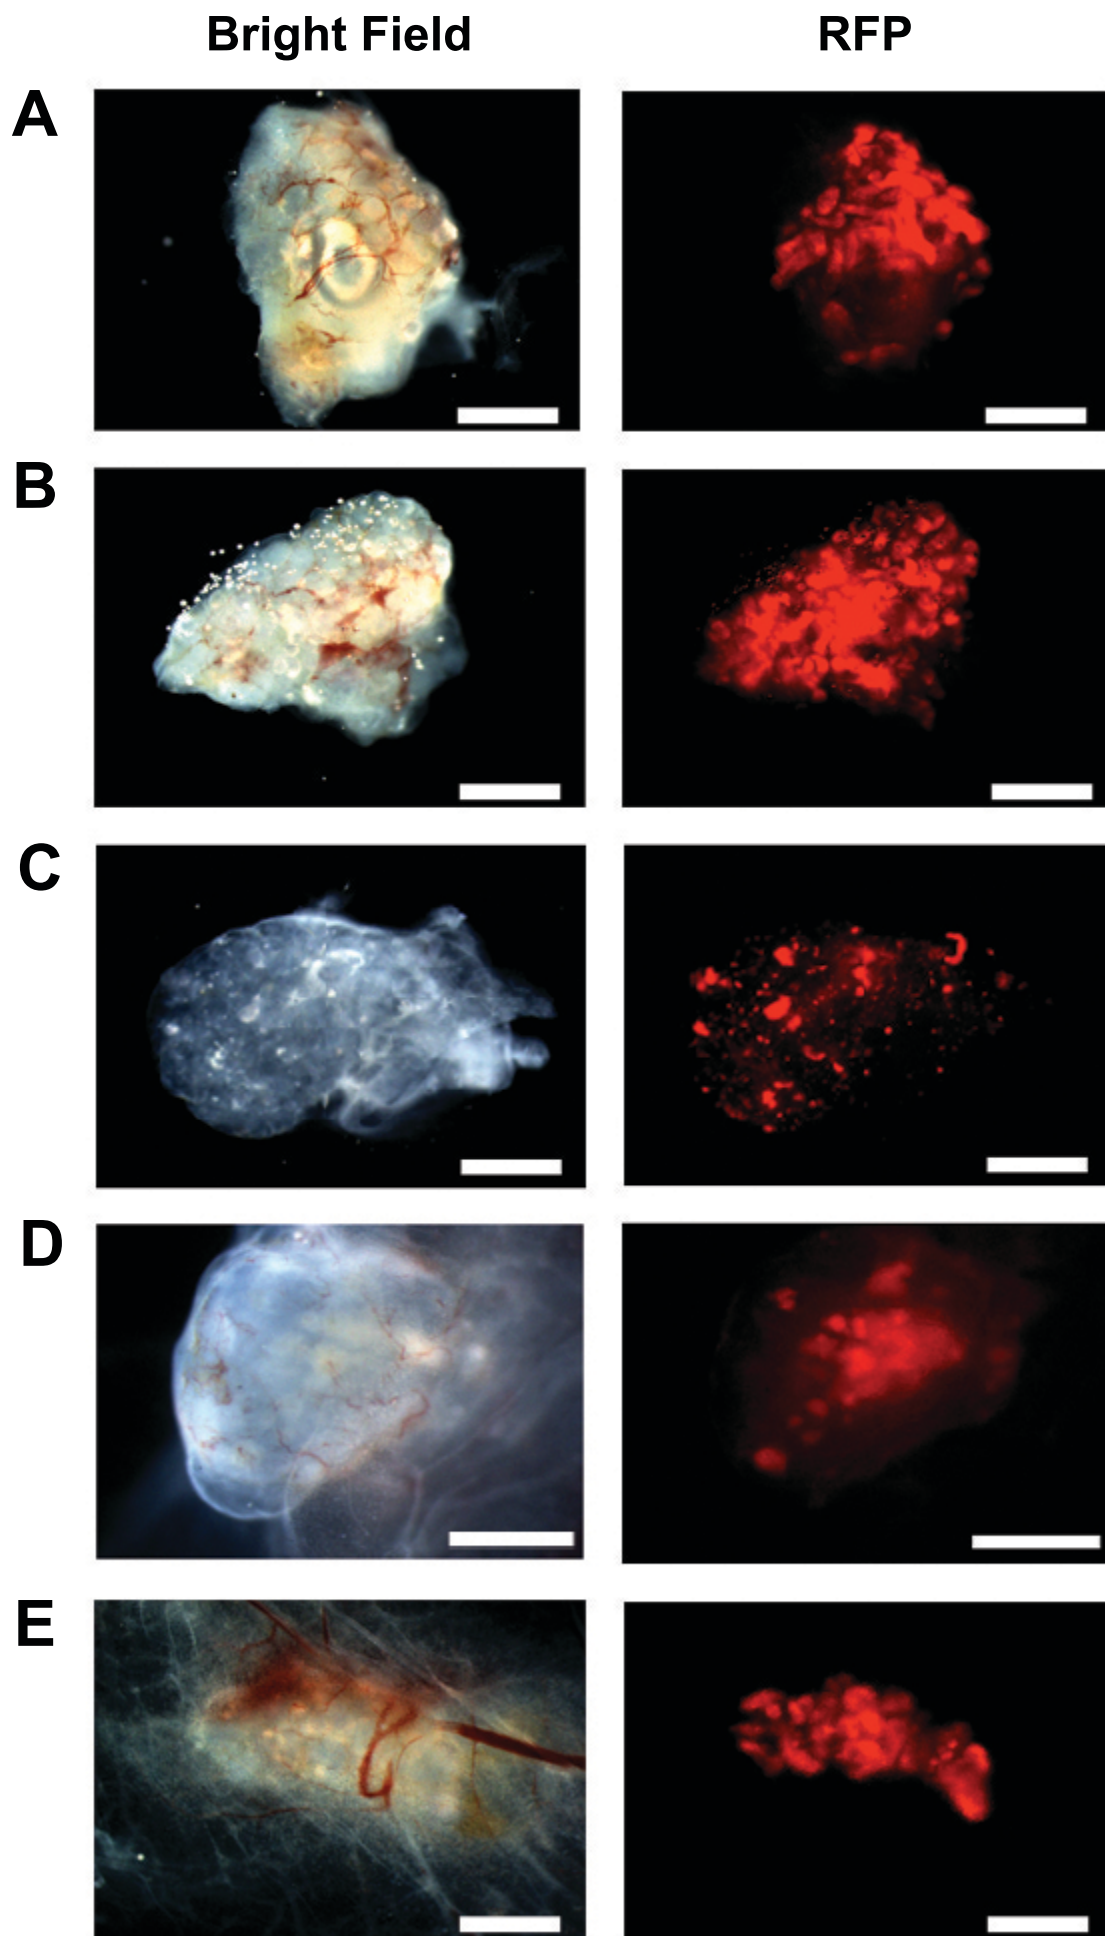

Supplement: 12885_2015_1572_MOESM9_ESM.pdf [file 12885_2015_1572_MOESM9_ESM.pdf]
