# Supplementary material for: Neoplastic transformation of porcine mammary epithelial cells in vitro and tumor formation in vivo
Source: Springer Nature journal article supplement (doi:10.1186/s12885-015-1572-7), 2015-07-30

Figure S3

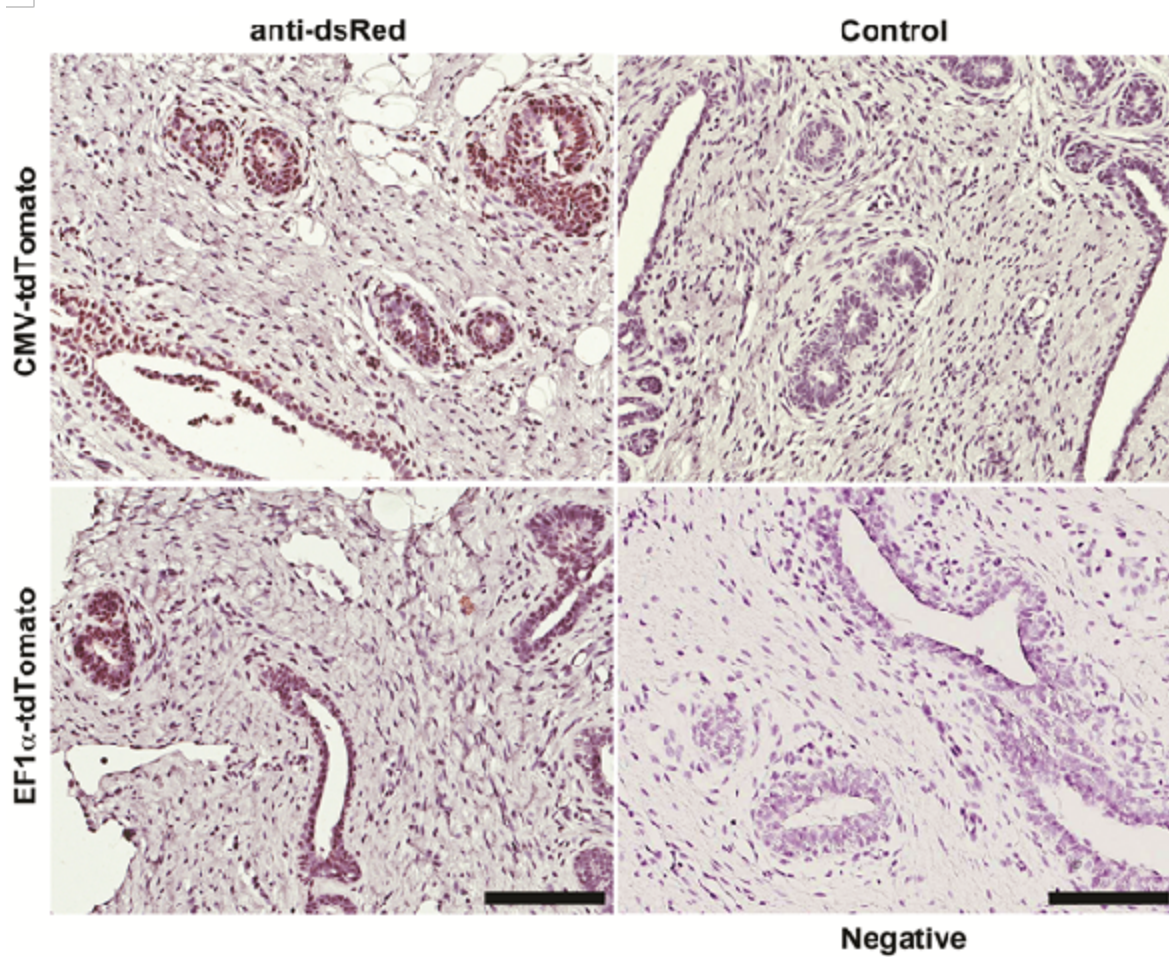

Supplement: MOESM3 [file 9744928]
