# Supplementary material for: Neoplastic transformation of porcine mammary epithelial cells in vitro and tumor formation in vivo
Source: Springer Nature journal article supplement (doi:10.1186/s12885-015-1572-7), 2015-07-30

Figure S8

**BRIGHT FIELD**

**RFP**

**MERGE**

**A**

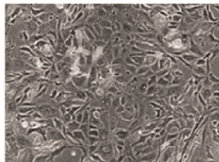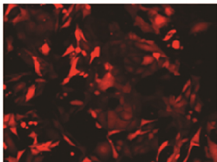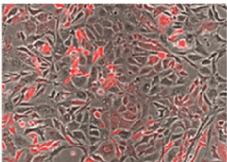

**B**

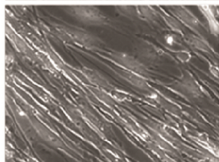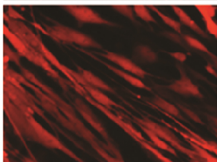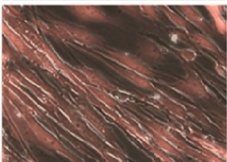

**C**

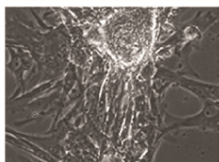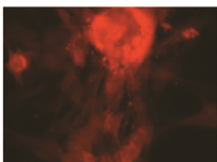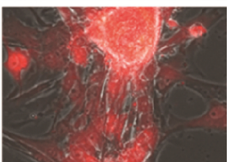

**D**

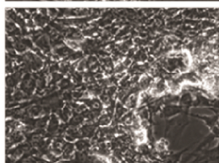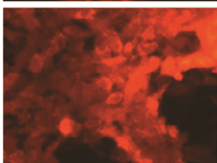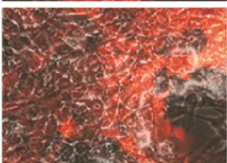

Supplement: MOESM8 [file 9744928]
